# Supplementary material
Source: MDPI journal article supplement (https://www.mdpi.com/2073-4441/16/9/1295)
Supplement: s1 [file s1]

## Supplementary Materials

### (A) Leaf litter microbial colonization

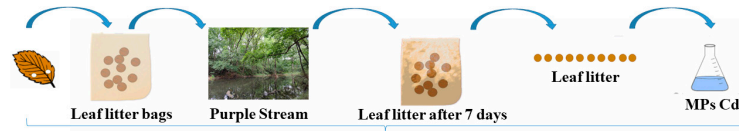

### (B) Leaf litter decomposition

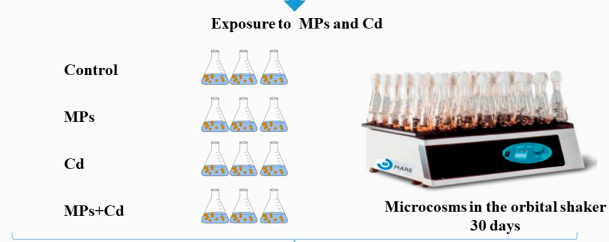

### (C) Invertebrates feeding assay

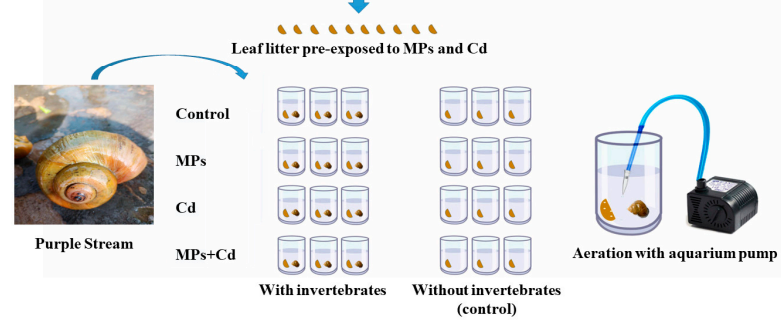

**Figure S1.** Experimental setup and flow.

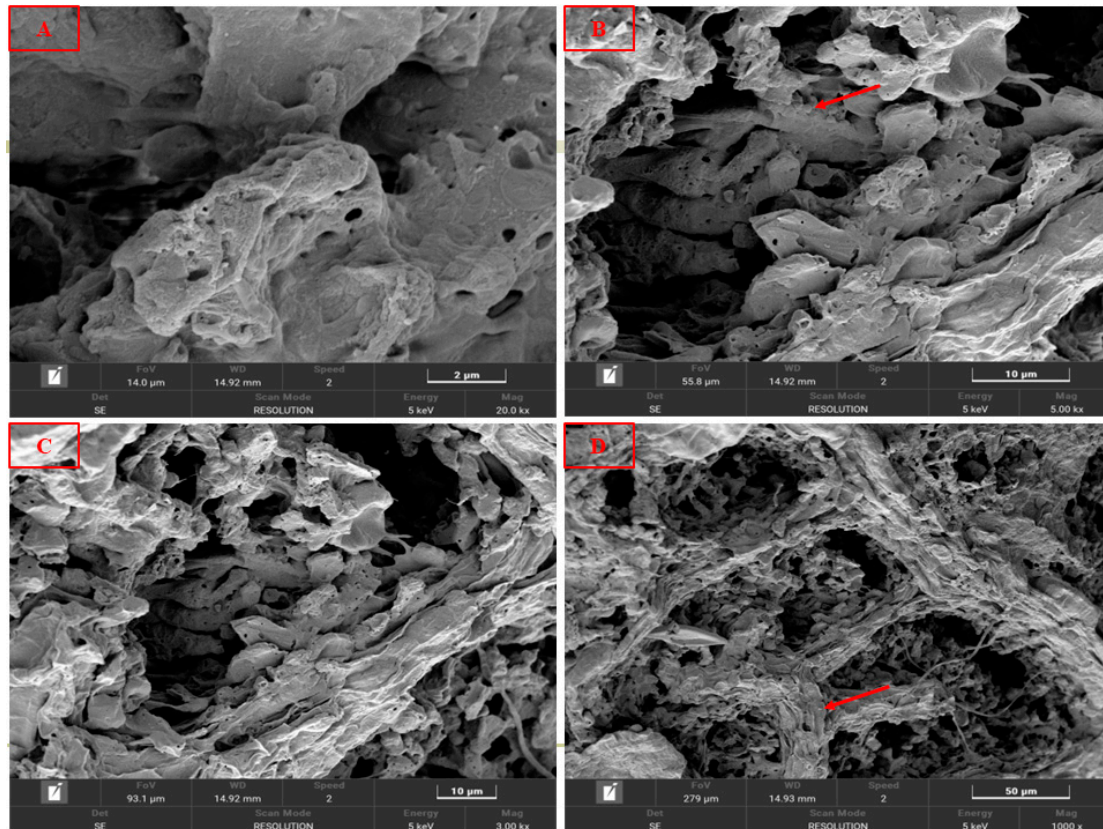

**Figure S2.** SEM images of litter surface structure. The red arrows in Figure B and D point to microplastic particles.

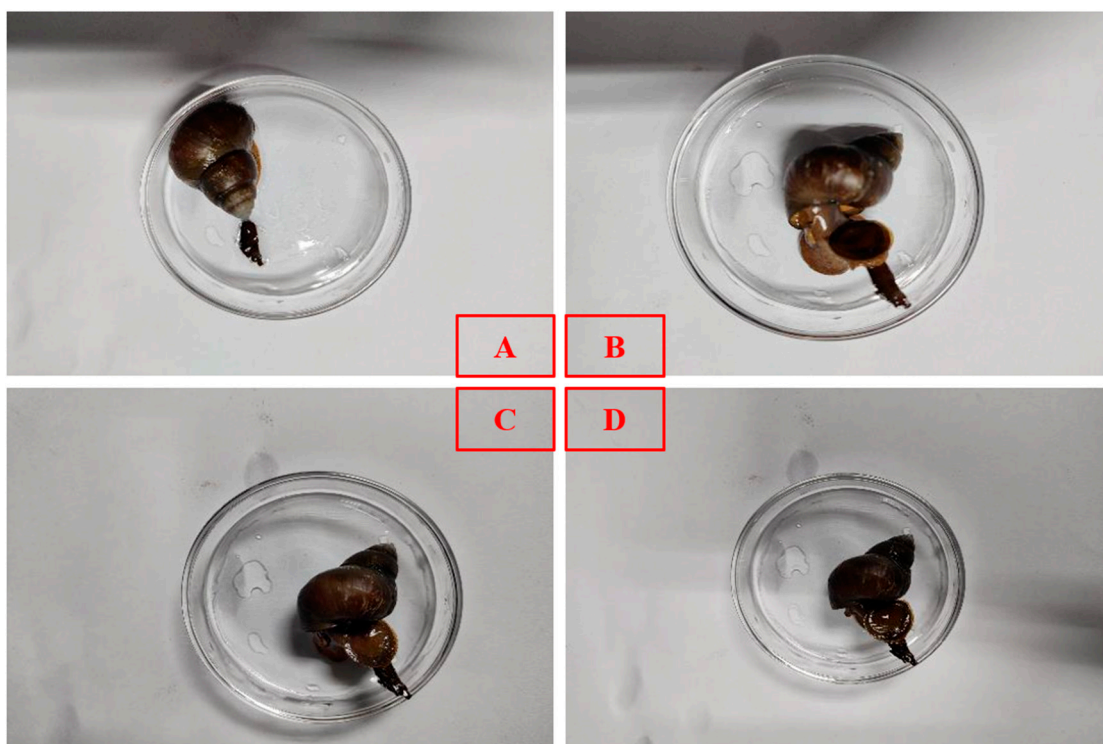

**Figure S3.** Feeding process of *Cipangopaludina chinensis*. (A) Near litter; (B) Open mouse; (C) Bite litter; (D) Chew litter.

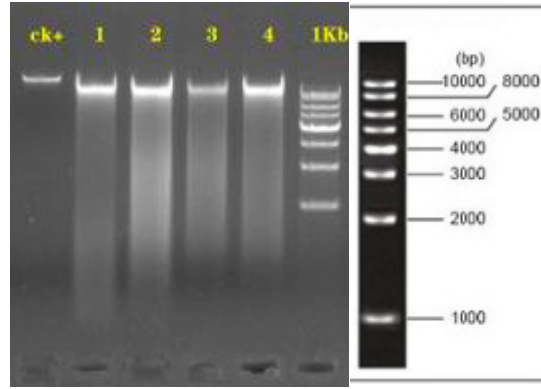

**Figure S4.** Agarose gel electrophoresis detection and band distribution diagram.

**Table S1.** Physicochemical properties of Zijin Mountain stream water.

| Index            | Value            |
|------------------|------------------|
| Temperature      | 22.8 °C          |
| pH               | 7.5              |
| Conductivity     | 680.1 $\mu$ s/cm |
| Dissolved Oxygen | 8.16 mg/L        |
| Redox Potential  | 77.3 mV          |

**Table S2.** Experimental setup.

| Group | Micropollutant | Concentration ( $\mu$ g/L) |
|-------|----------------|----------------------------|
| A     | Control        | 0                          |
| B     | MPs            | 30                         |
| C     | Cd             | 15                         |
| D     | MPs+Cd         | 30+15                      |

**Table S3.** PCR primer information.

| Sequencing region | Primer name | Primer sequence       |
|-------------------|-------------|-----------------------|
| ITS1F_ITS2R       | ITS1F       | CTTGGTCATTAGAGGAAGTAA |
|                   | ITS2R       | GCTGCGTTCTTCATCGATGC  |
